# Supplementary material for: Enhanced Methods for Local Ancestry Assignment in Sequenced Admixed Individuals
Source: PLOS journal article supplement (doi:10.1371/journal.pcbi.1003555), 2014-04-17
Supplement: S6 (10.1371/journal.pcbi.1003555.s006) [file journal.pcbi.1003555.s006]

**Table S2:** Correlation of ancestry calls between our approach and the 1000 Genomes calls in real admixed individuals from 1000 Genomes.

|          | African American (ASW) | Mexican (MXL)     | Puerto Rican (PUR) |
|----------|------------------------|-------------------|--------------------|
| LANC-CSV | 0.94 (0.994 0.988)     | 0.63 (0.84, 0.68) | 0.81 (0.96, 0.92)  |
| LAMP-LD  | 99.12 (1, 1)           | 0.66 (0.89, 0.77) | 0.79 (0.94, 0.79)  |

Accuracy reported as  $r^2$  (haploid accuracy, diploid accuracy). The 1000 Genomes consensus local ancestry calls were made using LAMP-LD as one of the four methods. This demonstrates that poor accuracy is likely a result of poor reference panels.
