# Supplementary material for: Enhanced Methods for Local Ancestry Assignment in Sequenced Admixed Individuals
Source: PLOS journal article supplement (doi:10.1371/journal.pcbi.1003555), 2014-04-17
Supplement: S7 (10.1371/journal.pcbi.1003555.s007) [file journal.pcbi.1003555.s007]

**Table S3:** Wahlund Effect on genotype probabilities

|        | Hardy-Weinberg Equilibrium with 10% admixture proportion | Unmixed 10% Admixture Proportion | Hardy-Weinberg Equilibrium with 50% admixture proportion | Unmixed 50% Admixture Proportion | Hardy-Weinberg Equilibrium with 80% admixture proportion | Unmixed 80% Admixture Proportion |
|--------|----------------------------------------------------------|----------------------------------|----------------------------------------------------------|----------------------------------|----------------------------------------------------------|----------------------------------|
| P(G=0) | 0.99                                                     | 0.99                             | 0.95                                                     | 0.95                             | 0.92                                                     | 0.92                             |
| P(G=1) | 0.01                                                     | 0.01                             | 0.05                                                     | 0.05                             | 0.08                                                     | 0.08                             |
| P(G=2) | 0.00                                                     | 0.00                             | 0.00                                                     | 0.00                             | 0.00                                                     | 0.00                             |

When an allele has different frequencies in different populations and the populations are looked at as a single population, the Wahlund Effect predicts a decrease in heterozygosity. The magnitude of the effect decreases with the difference in the allele frequencies and with mixing between the populations. 98% of CSVs have an allele frequency <5%. Here we report the genotype probabilities assuming the admixed populations have established Hardy-Weinberg Equilibrium, and assuming they are completely unmixed (the most extreme version of the Wahlund Effect). We report these values for 10%, 50% and 80% admixture proportion of the CSV containing population. This demonstrates that the Wahlund Effect will have negligible effect on our methods performance.
