# Supplementary material for: Enhanced Methods for Local Ancestry Assignment in Sequenced Admixed Individuals
Source: PLOS journal article supplement (doi:10.1371/journal.pcbi.1003555), 2014-04-17
Supplement: S8 (10.1371/journal.pcbi.1003555.s008) [file journal.pcbi.1003555.s008]

**Table S4:** Accuracy of Inference on 100 simulated admixed individuals among pairs of countries in Europe.

|     | FIN | GBR  | TSI  | CEU  |
|-----|-----|------|------|------|
| FIN | na  | 0.76 | 0.77 | 0.77 |
| GBR |     | na   | 0.74 | 0.75 |
| TSI |     |      | na   | 0.77 |
| CEU |     |      |      | na   |

We used admixture proportions of (0.5,0.5) and 6 generations of admixture. Accuracy is reported as haploid error (see main text). We observe a high proportion of heterozygous ancestry calls (over 90%), consistent with increased ambiguity in the calling using sCSVs for closely related populations.
